# Supplementary material for: Family relationships and adolescent drug use in Cameroon: a school- based cross-sectional study of prevalence, perceptions, and associated factors
Source: Research Square preprint supplement (doi:10.21203/rs.3.rs-7724777/v1), 2025-11-06
Supplement: Supplementary file 2 [file 09f4f9701adbd8fc4ccc71ef.docx]

The table presents collinearity diagnostics for the variables included in the multivariable model assessing the abuse of at least one psychoactive substance. All **Tolerance** values are close to 1 (≥0.90) and **VIF (Variance Inflation Factors)** range from 1.004 to 1.107. These results indicate no problematic multicollinearity among the independent variables. In practice, VIF values above 5 (or 10) would suggest serious concern.

Thus, the variables—educational level, life status, knowledge about drugs, relationships with father and mother, and alcohol abuse—can be simultaneously included in the model without risk of coefficient instability due to collinearity.

| **Coefficientsa** | | | |
| --- | --- | --- | --- |
| Model | | Collinearity statistics | |
| Tolerance | VIF |
| 1 | What is your level of education? | .983 | 1.018 |
| Status of life | .996 | 1.004 |
| Do you know what is drug? | .987 | 1.013 |
| with Father over the last twelve months | .903 | 1.107 |
| with Mother over the last twelve months | .908 | 1.101 |
| Abuse of Alcohol | .958 | 1.044 |
| a. Dependent variable: The abuse of at least one psychoactive substance | | | |

The table presents eigenvalues, condition indices, and variance proportions for the independent variables included in the model assessing the abuse of at least one psychoactive substance. Most condition indices are below the commonly used thresholds (≤10), with the exception of Dimension 7 (13.210), which would warrant closer attention. However, for this dimension, no two variables show variance proportions >0.50 simultaneously, which would normally indicate problematic multicollinearity.

Highlighted cells show the highest variance proportions: *Status of life* (0.73), *Level of education* (0.67), *Relationship with father* (0.53), *Relationship with mother* (0.71), and *Abuse of alcohol* (0.85). Although these values suggest that some variables contribute strongly to specific dimensions, they are distributed across different dimensions rather than clustering together.

Taken together, these results suggest that **no severe multicollinearity exists** among the predictors. The variables can be retained in the multivariable regression model without risk of instability or redundancy.

| **Collinearity diagnostics a** | | | | | | | | | | |
| --- | --- | --- | --- | --- | --- | --- | --- | --- | --- | --- |
| Model | Dimension | Eigenvalue | Index de condition | Proportions of variance | | | | | | |
| (Constante) | What is your level of education? | Status of life | Do you know what is drug? | with Father over the last twelve months | with Mother over the last twelve months | Abuse of Alcohol |
| 1 | 1 | 5.497 | 1.000 | .00 | .01 | .01 | .00 | .01 | .00 | .01 |
| 2 | .682 | 2.840 | .00 | .00 | .00 | .00 | .02 | .00 | .85 |
| 3 | .304 | 4.252 | .00 | .00 | .73 | .00 | .19 | .01 | .04 |
| 4 | .229 | 4.895 | .00 | .21 | .16 | .05 | .53 | .00 | .01 |
| 5 | .148 | 6.085 | .01 | .67 | .01 | .22 | .06 | .06 | .01 |
| 6 | .108 | 7.150 | .00 | .00 | .00 | .27 | .16 | .71 | .00 |
| 7 | .032 | 13.210 | .99 | .11 | .08 | .45 | .03 | .21 | .08 |
| a. Dependent variable: The abuse of at least one psychoactive substance | | | | | | | | | | |
