# Supplementary material for: Family relationships and adolescent drug use in Cameroon: a school- based cross-sectional study of prevalence, perceptions, and associated factors
Source: Research Square preprint supplement (doi:10.21203/rs.3.rs-7724777/v1), 2025-11-06
Supplement: Supplementary file 3 [file 0e8966831e524ab08a791ea7.docx]

**Family relationships and adolescent drug use in Cameroon: a school-based cross-sectional study on prevalence, perceptions, and associated factors**

# **QUESTIONNAIRE FOR STUDENTS**

This questionnaire is aimed at collecting data on the factors influencing drug abuse and effects of drug abuse among secondary school students. The information you provide will be treated with the utmost confidence and only for scientific purposes. Pleaserespond to all items honestly and responsible accordingly, please tick where necessary.

**Family relationships and adolescent drug use in Cameroon: a school-based cross-sectional study on prevalence, perceptions, and associated factors**

# **SECTION A SOCIO-DEMOGRAPHIC, ECONOMIC AND PERSONAL FACTORS ASSOCIATED WITH DRUG ABUSE**

**1. Date: (Day/Month/Year):** /_______/ _______/_______/

**2. Age (in years)** /_____/_____/

**3. Sex:**  *1. Male 2. Female*

**4. What is your level (grade) of education?**  *1. Form 3 2. Form 4 3.Form 5*

**5. What is your Religion?** *1. Catholic 2. Protestant 3. Pentecostal 4. Muslim 5. Born again 6. Non-believers*

**6. Who do you live with at home (Life status)?** *1. Either parents 2. Mother only 3. Father only 4. Grandparents 5. Aunty or Uncle 6. Self*

**7. Do you know what is drug?** *0. No 1. Yes*

**8. Which types of drugs do you know? Please name them** _________________________________________________________________________________________________________________________________________________________________________________________________________________________________

__________________________________________________________________________

**9. Do you know the effects of drugs? If yes name the effects of drugs that you know?** _________________________________________________________________________________________________________________________________________________________________________________________________________________________________

**10. In the last 12 months, have you use one or more these drugs and if so. How often? (Darken only one answer per drugs or substance)**

|  | *Never* | *Occasionally* | *Approximately Once a month* | *Once or twice during the week* | *3 times or more a week* | *Every day* |
| --- | --- | --- | --- | --- | --- | --- |
| Alcohol |  |  |  |  |  |  |
| Cannabis e.g marijuana, pot etc |  |  |  |  |  |  |
| Cocaine e.g. coke, snow |  |  |  |  |  |  |
| Glue-solvents |  |  |  |  |  |  |
| Hallucinogen e.g.estasy, blotter. |  |  |  |  |  |  |
| Heroin e.g. smack |  |  |  |  |  |  |
| Amphetamines speed |  |  |  |  |  |  |
| Others (Any of the following drugs without prescription burturates, sedative, hypnotics, tranquilizer) |  |  |  |  |  |  |

**11. Which among the following influences you most to take drugs?** *1. Parents 2. Friends 3. Media 4. Guidance 5.teachers 6. None of the above*

**6. Who among your parents used to take drugs?**

*1. Mother 2. Father 3. Both Father and mother 4. None*

**12. How can you describe your relationship with family members over the last few years?**

**NB:** “*A good relationship means that you feel listened to, respected, emotionally supported, and/or that you can communicate easily and trust this family member. A not good relationship means that you feel ignored, disrespected, not emotionally supported, or that communication is difficult or absent.*”

With Father: *0. Not good 1. Good*

With Mother: *0. Not good 1. Good*

With Brother(s) and sisters: *0. Not good 1. Good*

**13. Did drugs and substances always available around home** *0. No 1. Yes*

**14. What are your feelings when you face life’s frustrations and difficulties?**

*1. Always get stressed and anxious 2. Not easily affected 3.Talk to friends and family members*

**15. Are you at times asked by a family member to buy or prepare some of these drugs?**

*0. No 1.Yes if yes* which type…………………………

**16. How much did the following contribute to your use of alcohol and other drugs?** *Contributed a lot Moderately Did Not*

- Stress /____/ /______/ /___/
- Frustration/ anxiety /____/ /______/ /___/
- Boredom/loneliness /____/ /______/ /___/
- Need for social acceptance /____/ /______/ /___/
- Availability of drugs at home /___/ /_____/ /___/
- Father’s drinking/smoking /___/ /_____/ /___/
- Mother’s drinking/smoking /___/ /_____/ /___/
- Sister’s/Brother’s use of drugs /___/ /_____/ /___/
- Relatives’ use of drug /____/ /_____/ /___/
- Need to perform or achieve better. /___/ /_____/ /___/

**18. Which of the following media advertises drugs mostly?**

TV /_____/ Radios /____/ Newspapers /______/

**19. What impression did you had at first about alcohol drinking, cigarette smoking and others when you saw them being advertised in the media?**

i I thought it was fun /_______/

ii I thought it was a great thing to do /______/

Iii I admired those who smoke/ drink/_______/

Iv I thought drugs make one a winner/______/

Others (specify)……………………………………………………………………….

……………………………………………………………………………………

**20. Are drugs easily available to the students in your school?** *0. No 1.Yes*

**21. If yes, where do they get them from?**

- Other students /_____/
- Support staff /_______/
- Teachers /__________/
- Other **(specify)………………………………………………………………**
- **22. Since you joined this school, do you think there is an increase in drug abuse among students?** *0. No 1.Yes* If yes what can be the cause of it? ______________________________________________________________________________________________________________________________________________ **23. What are the characteristics of students on drugs?**

(i)…………………………………………………………………………………………………………………………………………………………………………………………………

(ii)………………………………………………………………………………………………………………………………………………………………………………………………….

(iii)………………………………………………………………………………………………………………………………………………………………………………………………

(iv)………………………………………………………………………………………………………………………………………………………………………………………………

(v)…………………………………………………………………………………………………………………………………………………………………………………………………

(vi)………………………………………………………………………………………………………………………………………………………………………………

**24. In your opinion why do students abuse drugs?**

(Rank them in order of prevalence)

- Availability /____/
- Curiosity /_____ /
- Rebellion /____/
- Psychological problems /___/
- Peer pressure /____/
- Advertisement /____/
- Academic pressure /_____/
- Misuse of leisure time/____/
- Ignorance **/______/**

**25. Is guidance and counseling department effectively dealing with drug abuse?**

*0. No 1.Yes* If yes how do they managed students who abused drug? _______________________________________________________________________________________________________________________________________________________________________________________________________________

**26. Suggest some preventive measures you would like to be put in place to curb drug menace.**

(i) ……………………………………………………………………………………………………………………………………………………………………………………

(ii)…………………………………………………………………………………………………………………………………………………………………………………

(iii)………………………………………………………………………………………………………………………………………………………………………………

(iv)………………………………………………………………………………………………………………………………………………………………………………

(v)……………………………………………………………………………………………………………………………………………………………………………………….
