# Supplementary material for: Family relationships and adolescent drug use in Cameroon: a school- based cross-sectional study of prevalence, perceptions, and associated factors
Source: Research Square preprint supplement (doi:10.21203/rs.3.rs-7724777/v1), 2025-11-06
Supplement: Supplementary file 4 [file 3ec392412f9787eb418b1169.xlsx]

## Sheet: Code Co-Occurrence Table
	● abnormalities Gr=2		● accidents Gr=1		● addiction Gr=9		● aggressiveness Gr=9		● anger Gr=3		● bad behaviour Gr=10		● black hands Gr=2		● brain diseases Gr=7		● cancer Gr=12		● courage Gr=10		● crime wave Gr=1		● death Gr=87		● decrease immunity Gr=2		● depression Gr=2		● double vision Gr=3		● dropout Gr=8		● fatigue Gr=3		● frustration Gr=5		● hallucination Gr=8		● health problem Gr=42		● heart problem Gr=3		● HIV Gr=1		● hunger Gr=1		● imprisonment Gr=3		● indiscipline Gr=1
	count	coefficient	count	coefficient	count	coefficient	count	coefficient	count	coefficient	count	coefficient	count	coefficient	count	coefficient	count	coefficient	count	coefficient	count	coefficient	count	coefficient	count	coefficient	count	coefficient	count	coefficient	count	coefficient	count	coefficient	count	coefficient	count	coefficient	count	coefficient	count	coefficient	count	coefficient	count	coefficient	count	coefficient	count
● abnormalities Gr=2	0	0	0	0	0	0	0	0	0	0	0	0	0	0	0	0	0	0	0	0	0	0	0	0	0	0	0	0	0	0	0	0	0	0	0	0	0	0	0	0	0	0	0	0	0	0	1	0.25	0
● accidents Gr=1	0	0	0	0	0	0	0	0	0	0	0	0	0	0	0	0	0	0	0	0	0	0	0	0	0	0	0	0	0	0	0	0	0	0	0	0	0	0	0	0	0	0	0	0	0	0	0	0	0
● addiction Gr=9	0	0	0	0	0	0	0	0	0	0	0	0	0	0	0	0	0	0	0	0	0	0	0	0	0	0	0	0	0	0	0	0	0	0	0	0	1	0.06	1	0.02	1	0.09	0	0	0	0	0	0	0
● aggressiveness Gr=9	0	0	0	0	0	0	0	0	0	0	0	0	0	0	0	0	0	0	0	0	0	0	0	0	0	0	0	0	0	0	0	0	0	0	0	0	0	0	0	0	0	0	0	0	0	0	0	0	0
● anger Gr=3	0	0	0	0	0	0	0	0	0	0	0	0	0	0	0	0	0	0	0	0	0	0	0	0	0	0	0	0	0	0	0	0	0	0	0	0	0	0	0	0	0	0	0	0	0	0	0	0	0
● bad behaviour Gr=10	0	0	0	0	0	0	0	0	0	0	0	0	0	0	0	0	0	0	0	0	0	0	0	0	0	0	0	0	0	0	0	0	0	0	0	0	0	0	0	0	0	0	0	0	0	0	0	0	0
● black hands Gr=2	0	0	0	0	0	0	0	0	0	0	0	0	0	0	0	0	0	0	0	0	0	0	0	0	0	0	0	0	0	0	0	0	0	0	0	0	0	0	0	0	0	0	0	0	0	0	0	0	0
● brain diseases Gr=7	0	0	0	0	0	0	0	0	0	0	0	0	0	0	0	0	0	0	0	0	0	0	1	0.01	0	0	0	0	0	0	0	0	0	0	0	0	0	0	1	0.02	0	0	0	0	0	0	0	0	0
● cancer Gr=12	0	0	0	0	0	0	0	0	0	0	0	0	0	0	0	0	0	0	1	0.05	0	0	4	0.04	0	0	0	0	0	0	0	0	0	0	0	0	0	0	1	0.02	0	0	0	0	0	0	0	0	0
● courage Gr=10	0	0	0	0	0	0	0	0	0	0	0	0	0	0	0	0	1	0.05	0	0	0	0	0	0	0	0	0	0	0	0	0	0	2	0.18	0	0	0	0	0	0	0	0	0	0	0	0	0	0	0
● crime wave Gr=1	0	0	0	0	0	0	0	0	0	0	0	0	0	0	0	0	0	0	0	0	0	0	0	0	0	0	0	0	0	0	0	0	0	0	0	0	0	0	1	0.02	0	0	0	0	0	0	0	0	0
● death Gr=87	0	0	0	0	0	0	0	0	0	0	0	0	0	0	1	0.01	4	0.04	0	0	0	0	0	0	0	0	0	0	1	0.01	3	0.03	0	0	3	0.03	0	0	8	0.07	1	0.01	1	0.01	0	0	1	0.01	0
● decrease immunity Gr=2	0	0	0	0	0	0	0	0	0	0	0	0	0	0	0	0	0	0	0	0	0	0	0	0	0	0	0	0	0	0	0	0	0	0	0	0	0	0	0	0	0	0	0	0	0	0	0	0	0
● depression Gr=2	0	0	0	0	0	0	0	0	0	0	0	0	0	0	0	0	0	0	0	0	0	0	0	0	0	0	0	0	0	0	0	0	0	0	0	0	0	0	0	0	0	0	0	0	0	0	0	0	0
● double vision Gr=3	0	0	0	0	0	0	0	0	0	0	0	0	0	0	0	0	0	0	0	0	0	0	1	0.01	0	0	0	0	0	0	0	0	0	0	0	0	0	0	0	0	0	0	0	0	0	0	0	0	0
● dropout Gr=8	0	0	0	0	0	0	0	0	0	0	0	0	0	0	0	0	0	0	0	0	0	0	3	0.03	0	0	0	0	0	0	0	0	0	0	1	0.08	0	0	0	0	0	0	0	0	0	0	0	0	0
● fatigue Gr=3	0	0	0	0	0	0	0	0	0	0	0	0	0	0	0	0	0	0	2	0.18	0	0	0	0	0	0	0	0	0	0	0	0	0	0	0	0	0	0	0	0	0	0	0	0	0	0	0	0	0
● frustration Gr=5	0	0	0	0	0	0	0	0	0	0	0	0	0	0	0	0	0	0	0	0	0	0	3	0.03	0	0	0	0	0	0	1	0.08	0	0	0	0	0	0	0	0	0	0	0	0	0	0	0	0	0
● hallucination Gr=8	0	0	0	0	1	0.06	0	0	0	0	0	0	0	0	0	0	0	0	0	0	0	0	0	0	0	0	0	0	0	0	0	0	0	0	0	0	0	0	0	0	0	0	0	0	0	0	0	0	0
● health problem Gr=42	0	0	0	0	1	0.02	0	0	0	0	0	0	0	0	1	0.02	1	0.02	0	0	1	0.02	8	0.07	0	0	0	0	0	0	0	0	0	0	0	0	0	0	0	0	0	0	0	0	0	0	0	0	0
● heart problem Gr=3	0	0	0	0	1	0.09	0	0	0	0	0	0	0	0	0	0	0	0	0	0	0	0	1	0.01	0	0	0	0	0	0	0	0	0	0	0	0	0	0	0	0	0	0	0	0	0	0	0	0	0
● HIV Gr=1	0	0	0	0	0	0	0	0	0	0	0	0	0	0	0	0	0	0	0	0	0	0	1	0.01	0	0	0	0	0	0	0	0	0	0	0	0	0	0	0	0	0	0	0	0	0	0	0	0	0
● hunger Gr=1	0	0	0	0	0	0	0	0	0	0	0	0	0	0	0	0	0	0	0	0	0	0	0	0	0	0	0	0	0	0	0	0	0	0	0	0	0	0	0	0	0	0	0	0	0	0	0	0	0
● imprisonment Gr=3	1	0.25	0	0	0	0	0	0	0	0	0	0	0	0	0	0	0	0	0	0	0	0	1	0.01	0	0	0	0	0	0	0	0	0	0	0	0	0	0	0	0	0	0	0	0	0	0	0	0	0
● indiscipline Gr=1	0	0	0	0	0	0	0	0	0	0	0	0	0	0	0	0	0	0	0	0	0	0	0	0	0	0	0	0	0	0	0	0	0	0	0	0	0	0	0	0	0	0	0	0	0	0	0	0	0
● kidney problems Gr=1	0	0	0	0	0	0	0	0	0	0	0	0	0	0	1	0.14	0	0	0	0	0	0	0	0	0	0	0	0	0	0	0	0	0	0	0	0	0	0	0	0	0	0	0	0	0	0	0	0	0
● lack social relation Gr=1	0	0	0	0	0	0	0	0	0	0	0	0	0	0	0	0	0	0	0	0	0	0	0	0	0	0	0	0	0	0	0	0	0	0	0	0	0	0	1	0.02	0	0	0	0	0	0	0	0	0
● liver problem Gr=6	0	0	0	0	0	0	0	0	0	0	0	0	0	0	0	0	0	0	0	0	0	0	0	0	0	0	0	0	0	0	0	0	0	0	0	0	0	0	0	0	0	0	0	0	0	0	0	0	0
● lost of appetite Gr=1	0	0	0	0	0	0	0	0	0	0	0	0	0	0	0	0	0	0	0	0	0	0	0	0	0	0	0	0	0	0	0	0	0	0	0	0	0	0	0	0	0	0	0	0	0	0	0	0	0
● lost of energy Gr=4	0	0	0	0	0	0	0	0	0	0	0	0	0	0	0	0	0	0	0	0	0	0	0	0	0	0	0	0	0	0	0	0	0	0	0	0	0	0	0	0	0	0	0	0	0	0	0	0	0
● lost of memory Gr=7	0	0	0	0	0	0	0	0	0	0	0	0	0	0	0	0	0	0	0	0	0	0	2	0.02	0	0	0	0	0	0	0	0	0	0	0	0	2	0.15	0	0	0	0	0	0	0	0	0	0	0
● lost of weight Gr=1	0	0	0	0	0	0	0	0	0	0	0	0	0	0	0	0	0	0	0	0	0	0	0	0	0	0	0	0	0	0	0	0	0	0	0	0	0	0	0	0	0	0	0	0	0	0	0	0	0
● lungs diseases Gr=58	0	0	1	0.02	0	0	0	0	0	0	0	0	2	0.03	1	0.02	2	0.03	0	0	0	0	9	0.07	0	0	0	0	1	0.02	0	0	0	0	0	0	1	0.02	1	0.01	0	0	0	0	0	0	0	0	0
● madness Gr=96	0	0	0	0	1	0.01	1	0.01	0	0	0	0	0	0	0	0	5	0.05	0	0	0	0	26	0.17	0	0	0	0	0	0	1	0.01	0	0	0	0	2	0.02	6	0.05	0	0	0	0	0	0	1	0.01	0
○ Marijuana Gr=178	0	0	0	0	0	0	0	0	0	0	0	0	0	0	0	0	0	0	0	0	0	0	0	0	0	0	0	0	0	0	0	0	0	0	0	0	0	0	0	0	0	0	0	0	0	0	0	0	0
● mental disorder Gr=43	0	0	0	0	4	0.08	0	0	0	0	9	0.2	0	0	0	0	0	0	0	0	0	0	9	0.07	0	0	0	0	0	0	0	0	0	0	0	0	0	0	1	0.01	0	0	0	0	0	0	0	0	1
● pain on the body Gr=1	0	0	0	0	0	0	0	0	0	0	0	0	0	0	0	0	0	0	0	0	0	0	0	0	0	0	0	0	0	0	0	0	0	0	0	0	0	0	0	0	0	0	0	0	0	0	0	0	0
● poor vision Gr=1	0	0	0	0	0	0	0	0	0	0	0	0	0	0	1	0.14	0	0	0	0	0	0	0	0	0	0	0	0	0	0	0	0	0	0	0	0	0	0	0	0	0	0	0	0	0	0	0	0	0
● powerful Gr=8	0	0	0	0	0	0	1	0.06	0	0	0	0	0	0	1	0.07	0	0	3	0.2	0	0	0	0	0	0	0	0	0	0	0	0	2	0.22	0	0	0	0	1	0.02	0	0	0	0	0	0	0	0	0
● prostitution Gr=1	0	0	0	0	0	0	0	0	0	0	0	0	0	0	0	0	0	0	0	0	0	0	0	0	0	0	0	0	0	0	1	0.13	0	0	0	0	0	0	0	0	0	0	0	0	0	0	0	0	0
● red eyes Gr=3	0	0	0	0	0	0	1	0.09	0	0	0	0	0	0	0	0	2	0.15	0	0	0	0	2	0.02	0	0	0	0	0	0	0	0	0	0	0	0	0	0	0	0	0	0	0	0	0	0	0	0	0
● separate families Gr=1	0	0	0	0	0	0	0	0	0	0	0	0	0	0	0	0	0	0	0	0	0	0	1	0.01	0	0	0	0	0	0	0	0	0	0	0	0	0	0	0	0	0	0	0	0	0	0	0	0	0
● sleepiness Gr=4	0	0	0	0	0	0	0	0	0	0	0	0	0	0	0	0	0	0	2	0.17	0	0	0	0	0	0	0	0	0	0	0	0	3	0.75	0	0	0	0	0	0	0	0	0	0	1	0.25	0	0	0
● stress Gr=4	0	0	0	0	0	0	0	0	3	0.75	0	0	0	0	0	0	0	0	0	0	0	0	1	0.01	0	0	0	0	0	0	0	0	0	0	0	0	0	0	0	0	0	0	0	0	0	0	0	0	0
[truncated: 33 more columns]

## Sheet: Info
Title:	ATLAS.ti - Code Co-Occurrence Report
Project:	Leo
User:	Mobile46
Date:	07/04/2025 - 11:14:10
Values:	Count and Coefficient
Abbreviations
Gr	Groundedness of a code (number of quotations coded by a code)
