# Supplementary material for: Family relationships and adolescent drug use in Cameroon: a school- based cross-sectional study of prevalence, perceptions, and associated factors
Source: Research Square preprint supplement (doi:10.21203/rs.3.rs-7724777/v1), 2025-11-06
Supplement: Supplementary file 5 [file 78e4e47b75fee0aa651fdea0.xlsx]

## Sheet: Code Co-Occurrence Table
	○ Alcohol Gr=13		○ Cigarette/Tobacco Gr=22		○ cocaine Gr=153		○ Marijuana Gr=178		○ Sedatives drugs Gr=2		○ Tramadol Gr=48
	count	coefficient	count	coefficient	count	coefficient	count	coefficient	count	coefficient	count	coefficient
○ Alcohol Gr=13	0	0	0	0	4	0.02	5	0.03	0	0	0	0
○ Cigarette/Tobacco Gr=22	0	0	0	0	7	0.04	5	0.03	0	0	4	0.06
○ cocaine Gr=153	4	0.02	7	0.04	0	0	64	0.24	0	0	16	0.09
○ Hallucinogens Gr=1	0	0	0	0	0	0	0	0	0	0	0	0
○ Heroine Gr=3	1	0.07	0	0	1	0.01	2	0.01	0	0	0	0
○ Marijuana Gr=178	5	0.03	5	0.03	64	0.24	0	0	0	0	11	0.05
○ Sedatives drugs Gr=2	0	0	0	0	0	0	0	0	0	0	0	0
○ Tramadol Gr=48	0	0	4	0.06	16	0.09	11	0.05	0	0	0	0

## Sheet: Info
Title:	ATLAS.ti - Code Co-Occurrence Report
Project:	Leo
User:	Mobile46
Date:	17/06/2025 - 13:03:06
Values:	Count and Coefficient
Abbreviations
Gr	Groundedness of a code (number of quotations coded by a code)
