# Supplementary material for: Family relationships and adolescent drug use in Cameroon: a school- based cross-sectional study of prevalence, perceptions, and associated factors
Source: Research Square preprint supplement (doi:10.21203/rs.3.rs-7724777/v1), 2025-11-06
Supplement: Supplementary file 6 [file 83b959155c84ac1bca12b4cf.docx]

The internal consistency of the 7-item scale used to assess illegal psychoactive substance use was evaluated using three indices. The results indicated excellent internal consistency, with Cronbach’s Alpha = 0.917, McDonald’s Omega = 0.919, and Guttman’s Lambda-6 = 0.955.

**Table .** Internal Consistency Indices for the 7-Item Scale Measuring Illegal Psychoactive Substance Use Among Adolescents

| 7 items | Moyenne | Ecart type | N |
| --- | --- | --- | --- |
| Cannabis e.g marijuana, pot etc | 1.04 | .401 | 352 |
| Cocaine e.g. coke, snow | 1.03 | .309 | 352 |
| Glue-solvents | 1.04 | .368 | 352 |
| Hallucinogen e.g.estasy, blotter. | 1.03 | .296 | 352 |
| Heroin e.g. smack | 1.03 | .332 | 352 |
| Amphetamines speed | 1.04 | .401 | 352 |
| Others (Any of the following drugs without prescription burturates, sedative, hypnotics, tranquilizer) | 1.03 | .319 | 352 |
| Scale reliability |  |  |  |
| Cronbach Alpha | 0.917 |  |  |
| Mc Donald’s Omega | 0.919 |  |  |
| Guttman’s Lambda 6 | 0.955 |  |  |
