# Supplementary material for: Family relationships and adolescent drug use in Cameroon: a school- based cross-sectional study of prevalence, perceptions, and associated factors
Source: Research Square preprint supplement (doi:10.21203/rs.3.rs-7724777/v1), 2025-11-06
Supplement: Supplementary file 7 [file d48fc5f79428510f26d80fb6.docx]

**Table : Initial multivariable model assessing factors associated with alcohol abuse (variables with p < 0.2 in univariate analysis were introduced into this model).”**

| Terme du modèle | Coefficient | Erreur standard | t | Sig. | 95% Intervalle de confiance | | Exp(Coefficient) | Intervalle de confiance à 95 % pour Exp (Coefficient) | |
| --- | --- | --- | --- | --- | --- | --- | --- | --- | --- |
| Inférieur | Supérieur | Inférieur | Supérieur |
| Constante | -1.221 | .3637 | -3.358 | .001 | -1.937 | -.506 | .295 | .144 | .603 |
| School=3 | -.401 | .3202 | -1.251 | .212 | -1.030 | .229 | .670 | .357 | 1.258 |
| School=2 | -.113 | .1808 | -.627 | .531 | -.469 | .242 | .893 | .626 | 1.274 |
| School=1 | 0b | . | . | . | . | . | . | . | . |
| Age_r=2 | .553 | .1857 | 2.977 | .003 | .188 | .918 | 1.738 | 1.206 | 2.504 |
| Age_r=1 | 0b | . | . | . | . | . | . | . | . |
| Sex=2 | -.221 | .1592 | -1.390 | .166 | -.535 | .092 | .801 | .586 | 1.096 |
| Sex=1 | 0b | . | . | . | . | . | . | . | . |
| Education=3 | .052 | .2375 | .217 | .828 | -.416 | .519 | 1.053 | .660 | 1.680 |
| Education=2 | .498 | .2147 | 2.321 | .021 | .076 | .921 | 1.646 | 1.079 | 2.511 |
| Education=1 | 0b | . | . | . | . | . | . | . | . |
| StatusLife=5 | .282 | .2247 | 1.253 | .211 | -.161 | .724 | 1.325 | .852 | 2.062 |
| StatusLife=4 | -.014 | .2519 | -.057 | .955 | -.510 | .481 | .986 | .601 | 1.618 |
| StatusLife=3 | -.525 | .4280 | -1.227 | .221 | -1.367 | .317 | .592 | .255 | 1.373 |
| StatusLife=2 | -.273 | .1965 | -1.388 | .166 | -.659 | .114 | .761 | .517 | 1.121 |
| StatusLife=1 | 0b | . | . | . | . | . | . | . | . |
| hearing_Drugs=1 | -.117 | .2147 | -.547 | .585 | -.540 | .305 | .889 | .583 | 1.356 |
| hearing_Drugs=0 | 0b | . | . | . | . | . | . | . | . |
| Relationship_1=1 | -.341 | .1658 | -2.055 | .041 | -.667 | -.015 | .711 | .513 | .986 |
| Relationship_1=0 | 0b | . | . | . | . | . | . | . | . |
| Relationship_2=1 | -.003 | .2052 | -.014 | .989 | -.407 | .401 | .997 | .666 | 1.493 |
| Relationship_2=0 | 0b | . | . | . | . | . | . | . | . |
| Environemental_Factor_1=1 | .437 | .1691 | 2.585 | .010 | .104 | .770 | 1.548 | 1.110 | 2.159 |
| Environemental_Factor_1=0 | 0b | . | . | . | . | . | . | . | . |
| Individual_Factor_Emotional=3 | -.080 | .1858 | -.432 | .666 | -.446 | .285 | .923 | .640 | 1.330 |
| Individual_Factor_Emotional=2 | .118 | .1964 | .599 | .550 | -.269 | .504 | 1.125 | .764 | 1.655 |
| Individual_Factor_Emotional=1 | 0b | . | . | . | . | . | . | . | . |
| Harmful_risk_reduction=1 | .178 | .1451 | 1.224 | .222 | -.108 | .463 | 1.194 | .898 | 1.589 |
| Harmful_risk_reduction=0 | 0b | . | . | . | . | . | . | . | . |
| Drug_Abuse_r=1 | .870 | .1962 | 4.431 | .000 | .484 | 1.256 | 2.386 | 1.622 | 3.510 |
| Drug_Abuse_r=0 | 0b | . | . | . | . | . | . | . | . |
| GF_r=1 | .196 | .1752 | 1.121 | .263 | -.148 | .541 | 1.217 | .862 | 1.718 |
| GF_r=0 | 0b | . | . | . | . | . | . | . | . |
| Distribution de probabilité : Poisson  Fonction de lien : Log | | | | | | | | | |
| a. Cible : Abuse of Alcohol | | | | | | | | | |
| b. Ce coefficient est défini sur zéro car il est redondant. | | | | | | | | | |
