# Supplementary material for: Family relationships and adolescent drug use in Cameroon: a school- based cross-sectional study of prevalence, perceptions, and associated factors
Source: Research Square preprint supplement (doi:10.21203/rs.3.rs-7724777/v1), 2025-11-06
Supplement: Supplementary file 8 [file de406586d5d9fc570f27761a.docx]

The table shows the proportional distribution of the study sample (n = 352) across schools and grade levels. Nearly half of participants were from School 1 (49.1%), followed by School 2 (39.8%), while School 3 contributed only 11.1% of the total sample. By grade, the largest group came from Form 3 (48.9%), followed by Form 5 (29.8%) and Form 4 (21.3%). Notably, School 3 had no Form 3 students enrolled, explaining its smaller contribution.

This distribution reflects the purposive–random stratified sampling strategy, ensuring that each participating school and grade level was proportionally represented while accounting for structural differences between institutions.

**Table. Sample allocation by school and grade level (n = 352)**

| **School** | **Form 5** | **Form 4** | **Form 3** | **Total** |
| --- | --- | --- | --- | --- |
| **School 1** | 32 | 29 | 112 | 173 |
| **School 2** | 49 | 31 | 60 | 140 |
| **School 3** | 24 | 15 | 0 | 39 |
| **Total** | 105 | 75 | 172 | 352 |
